# Supplementary material for: Iron Imaging as a Diagnostic Tool for Parkinson's Disease: A Systematic Review and Meta-Analysis
Source: Front Neurol. 2020 May 28;11:366. doi: 10.3389/fneur.2020.00366 (PMC7270360; doi:10.3389/fneur.2020.00366)
Supplement: Supplementary Table 2 — Quadas questionnaire. [file Data_Sheet_2.xlsx]

## Sheet: R2 star
Quadas - Tool
	Ordidge, 1994	Graham, 2000	Martin, 2008	Baudrexel, 2010	Péran, 2010	Focke, 2011	Du, 2012	Bunzeck, 2013	Rossi, 2013	Ulla, 2013	Lewis,2013	Barbosa, 2015	He, 2015	Murakami.,2015	Pyatigorskaya, 2015	Reimao, 2015	Wieler, 2015	Guan, 2016	Hopes,2016	Isaias, 2016	Langkammer. 2016	Du,2018	Langley, 2019	Pesch, 2019	Ghassaban, 2019	Arribarat, 2019	Li,2019
1. Was the spectrum of patients representative of the patients who will receive the test in practice?	YES	YES	YES	YES	YES	YES	YES	YES	YES	YES	YES	YES	YES	YES	YES	YES	YES	YES	YES	YES	YES	YES	YES	YES	YES	YES	YES
2. Were selection criteria clearly described?	NO	YES	YES	YES	YES	YES	YES	YES	YES	YES	YES	YES	YES	NO	YES	YES	YES	YES	YES	YES	YES	YES	YES	YES	YES	YES	YES
3. Is the reference standard likely to correctly classify the target condition?	NO	YES	YES	YES	YES	YES	YES	YES	UNCLEAR	YES	YES	YES	YES	YES	YES	YES	YES	YES	YES	YES	YES	YES	YES	YES	UNCLEAR	UNCLEAR	YES
4. Is the time period between reference standard and index test short enough to be reasonably sure that the target condition did not change between the two tests?	N/A	N/A	N/A	N/A	N/A	N/A	N/A	N/A	N/A	YES	YES	N/A	N/A	YES	N/A	N/A	N/A	N/A	YES	YES	N/A	YES	N/A	N/A	N/A	N/A	N/A
5. Did the whole sample or a random selection of the sample, receive verification using a reference standard?	N/A	YES	YES	YES	YES	YES	YES	YES	UNCLEAR	YES	YES	YES	YES	YES	YES	YES	YES	YES	YES	YES	YES	YES	YES	YES	UNCLEAR	YES	YES
6. Did patients receive the same reference standard regardless of the index test result?	N/A	YES	YES	YES	YES	YES	YES	YES	YES	YES	YES	YES	YES	YES	YES	YES	YES	YES	YES	YES	YES	YES	YES	YES	YES	YES	YES
7. Was the reference standard independent of the index test (i.e. the index test did not form part of the reference standard)?	N/A	YES	YES	YES	YES	YES	YES	YES	YES	YES	YES	YES	YES	YES	YES	YES	YES	YES	YES	YES	YES	YES	YES	YES	YES	YES	YES
8. Was the execution of the index test described in sufficient detail to permit replication of the test?	YES	YES	YES	YES	YES	YES	YES	YES	YES	YES	YES	YES	YES	YES	YES	YES	YES	YES	YES	YES	YES	YES	YES	YES	YES	YES	YES
9. Was the execution of the reference standard described in sufficient detail to permit its replication?	NO	YES	YES	YES	YES	YES	YES	YES	UNCLEAR	YES	YES	YES	YES	YES	YES	YES	YES	YES	YES	YES	YES	YES	NO	YES	NO	NO	YES
10. Were the index test results interpreted without knowledge of the results of the reference standard?	YES	UNCLEAR	YES	UNCLEAR	YES	YES	YES	YES	YES	YES	UNCLEAR	UNCLEAR	YES	YES	YES	YES	YES	YES	YES	YES	YES	YES	UNCLEAR	UNCLEAR	UNCLEAR	UNCLEAR	YES
11. Were the reference standard results interpreted without knowledge of the results of the index test?	UNCLEAR	YES	YES	YES	YES	YES	YES	YES	YES	YES	YES	YES	YES	YES	YES	YES	YES	YES	YES	YES	YES	YES	YES	YES	YES	YES	YES
12. Were the same clinical data available when test results were interpreted as would be available when the test is used in practice?	YES	YES	YES	YES	YES	YES	YES	YES	YES	YES	YES	YES	YES	YES	YES	YES	YES	YES	YES	YES	YES	YES	YES	YES	YES	YES	YES
13. Were uninterpretable /intermediate test results reported?	N/A	N/A	N/A	N/A	YES	N/A	N/A	N/A	N/A	N/A	N/A	YES	N/A	YES	YES	N/A	YES	N/A	N/A	YES	N/A	YES	N/A	N/A	N/A	N/A	YES
14. Were withdrawals from the study explained?	N/A	N/A	N/A	YES	N/A	YES	N/a	N/A	N/A	YES	YES	N/A	YES	N/A	N/A	N/A	N/A	N/A	N/A	N/A	N/A	N/A	N/A	N/A	N/A	N/A	YES

## Sheet: SWI
	Gupta, 2010	Zhang, 2010	Jin, 2012	Loftipour, 2012	Wang, 2012	Rossi, 2013	Wang, 2013	Wu, 2014	Isaias, 2016	Martin-Bastida, 2016
1. Was the spectrum of patients representative of the patients who will receive the test in practice?	YES	YES	YES	YES	YES	YES	YES	YES	YES	YES
2. Were selection criteria clearly described?	YES	YES	YES	YES	YES	YES	YES	YES	YES	NO
3. Is the reference standard likely to correctly classify the target condition?	YES	YES	YES	YES	YES	UNCLEAR	YES	YES	YES	YES
4. Is the time period between reference standard and index test short enough to be reasonably sure that the target condition did not change between the two tests?	YES	YES	YES	N/A	N/A	N/A	N/A	N/A	YES	N/A
5. Did the whole sample or a random selection of the sample, receive verification using a reference standard?	NO	YES	YES	YES	YES	UNCLEAR	YES	YES	YES	YES
6. Did patients receive the same reference standard regardless of the index test result?	YES	YES	YES	YES	YES	YES	YES	YES	YES	YES
7. Was the reference standard independent of the index test (i.e. the index test did not form part of the reference standard)?	YES	YES	YES	YES	YES	YES	YES	YES	YES	YES
8. Was the execution of the index test described in sufficient detail to permit replication of the test?	YES	YES	YES	YES	YES	YES	YES	YES	YES	YES
9. Was the execution of the reference standard described in sufficient detail to permit its replication?	YES	YES	YES	NO	YES	UNCLEAR	YES	YES	YES	YES
10. Were the index test results interpreted without knowledge of the results of the reference standard?	YES	UNCLEAR	YES	YES	YES	YES	YES	YES	YES	YES
11. Were the reference standard results interpreted without knowledge of the results of the index test?	YES	YES	N/A	YES	YES	YES	YES	YES	YES	YES
12. Were the same clinical data available when test results were interpreted as would be available when the test is used in practice?	YES	YES	YES	YES	YES	YES	YES	YES	YES	YES
13. Were uninterpretable /intermediate test results reported?	N/A	N/A	N/A	N/A	YES	N/A	N/A	N/A	N/A	N/A
14. Were withdrawals from the study explained?	N/A	N/A	N/A	N/A	N/A	N/A	N/A	N/A	N/A	YES

## Sheet: QSM
	Barbosa, 2015	He, 2015	Murakami, 2015	Azuma, 2016	Guan, 2016	Langkammer, 2016	Xuan, 2017	Du, 2018	Kim, 2018	An,2018	Takahashi, 2018	Shin, 2018	Bergsland, 2019	Shahmaei, 2019	Ghassaban, 2019	Li, 2019	Chen, 2019
1. Was the spectrum of patients representative of the patients who will receive the test in practice?	YES	YES	YES	YES	YES	YES	YES	YES	YES	YES	YES	YES	YES	YES	YES	YES	YES
2. Were selection criteria clearly described?	YES	YES	YES	YES	YES	YES	YES	YES	YES	YES	YES	YES	YES	YES	YES	YES	YES
3. Is the reference standard likely to correctly classify the target condition?	YES	YES	YES	YES	YES	YES	YES	YES	YES	YES	YES	YES	YES	YES	UNCLEAR	YES	YES
4. Is the time period between reference standard and index test short enough to be reasonably sure that the target condition did not change between the two tests?	N/A	N/A	N/A	N/A	N/A	N/A	YES	YES	N/A	YES	N/A	YES	YES	N/A	N/A	N/A	YES
5. Did the whole sample or a random selection of the sample, receive verification using a reference standard?	YES	YES	YES	YES	YES	YES	YES	YES	YES	YES	YES	YES	YES	YES	UNCLEAR	YES	YES
6. Did patients receive the same reference standard regardless of the index test result?	YES	YES	YES	YES	YES	YES	YES	YES	YES	YES	YES	YES	YES	YES	YES	YES	YES
7. Was the reference standard independent of the index test (i.e. the index test did not form part of the reference standard)?	YES	YES	YES	YES	YES	YES	YES	YES	YES	YES	YES	YES	YES	YES	YES	YES	YES
8. Was the execution of the index test described in sufficient detail to permit replication of the test?	YES	YES	YES	YES	YES	YES	YES	YES	YES	YES	YES	YES	YES	YES	YES	YES	YES
9. Was the execution of the reference standard described in sufficient detail to permit its replication?	YES	YES	YES	YES	YES	YES	YES	YES	YES	YES	YES	YES	YES	YES	NO	YES	YES
10. Were the index test results interpreted without knowledge of the results of the reference standard?	UNCLEAR	YES	YES	YES	YES	YES	YES	YES	YES	YES	UNCLEAR	UNCLEAR	YES	UNCLEAR	UNCLEAR	YES	UNCLEAR
11. Were the reference standard results interpreted without knowledge of the results of the index test?	YES	YES	YES	YES	YES	YES	YES	YES	YES	YES	YES	YES	YES	YES	YES	YES	YES
12. Were the same clinical data available when test results were interpreted as would be available when the test is used in practice?	YES	YES	YES	YES	YES	YES	YES	YES	YES	YES	YES	YES	YES	YES	YES	YES	YES
13. Were uninterpretable /intermediate test results reported?	YES	N/A	YES	N/A	N/A	N/A	YES	YES	YES	N/A	N/A	N/A	N/A	N/A	YES	YES	N/A
14. Were withdrawals from the study explained?	N/A	YES	N/A	N/A	N/A	N/A	N/A	N/A	YES	N/A	N/A	N/A	UNCLEAR	N/A	N/A	YES	UNCLEAR
